# Supplementary material for: Photo-controlled self-assembly behavior of novel amphiphilic polymers with a rosin-based azobenzene group
Source: Royal Society of Chemistry journal article supplement (doi:10.1039/d1nj04575j), 2021-12-08
Supplement: d1nj04575j1.pdf [file d1nj04575j1.pdf]

# Supporting Information

## Photo-controlled self-assembly behavior of novel amphiphilic polymers with rosin-based azobenzene group

Wanbing Li,<sup>a,b</sup> Haibo Zhang,<sup>a\*</sup> Zhaolan Zhai,<sup>a</sup> Xujuan Huang,<sup>c</sup> Shibin Shang,<sup>a\*</sup>

Zhanqian Song<sup>a</sup>

<sup>a</sup>Institute of Chemical Industry of Forest Products, CAF; National Engineering Lab. for Biomass Chemical Utilization; Key Lab. of Chemical Engineering of Forest Products, National Forestry and Grassland Administration; Key Lab. of Biomass Energy and Material, Jiangsu Province, Nanjing 210042, P. R. China

<sup>b</sup>Co-Innovation Center of Efficient Processing and Utilization of Forest Resources, Nanjing Forestry University, Nanjing 210037, P. R. China

<sup>c</sup>School of chemical and chemistry, Yancheng Institute of Technology, Yancheng 210042, Jiangsu Province, China

\* Haibo Zhang and Shibin Shang ([shdzhanghaibo@163.com](mailto:shdzhanghaibo@163.com); [shangsb@hotmail.com](mailto:shangsb@hotmail.com))

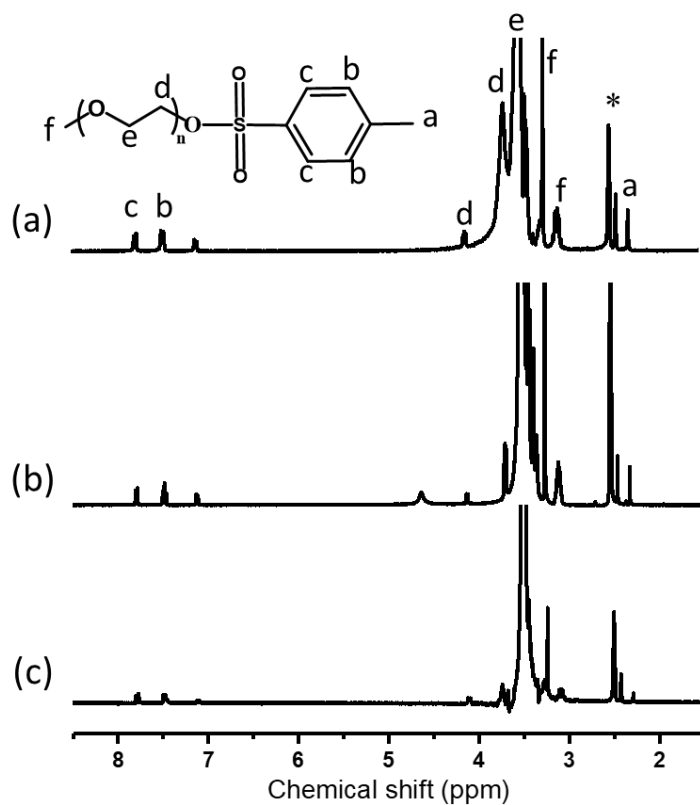

**Figure S1:**  $^1\text{H}$  NMR spectra of (a) PMP<sub>17</sub>, (b) PMP<sub>34</sub>, and (c) PMP<sub>69</sub> in DMSO-d<sub>6</sub>. (The corresponding assignment used PMP<sub>17</sub> as an example. \* represents solvent peak)

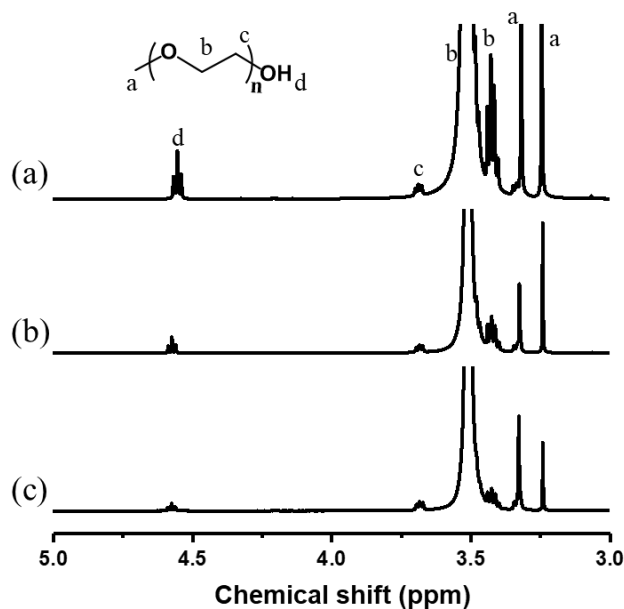

**Figure S2:**  $^1\text{H}$  NMR spectra of (a) PEG<sub>17</sub>, (b) PEG<sub>34</sub>, and (c) PEG<sub>69</sub> in DMSO-d<sub>6</sub>. (The corresponding assignment used PEG<sub>17</sub> as an example.)

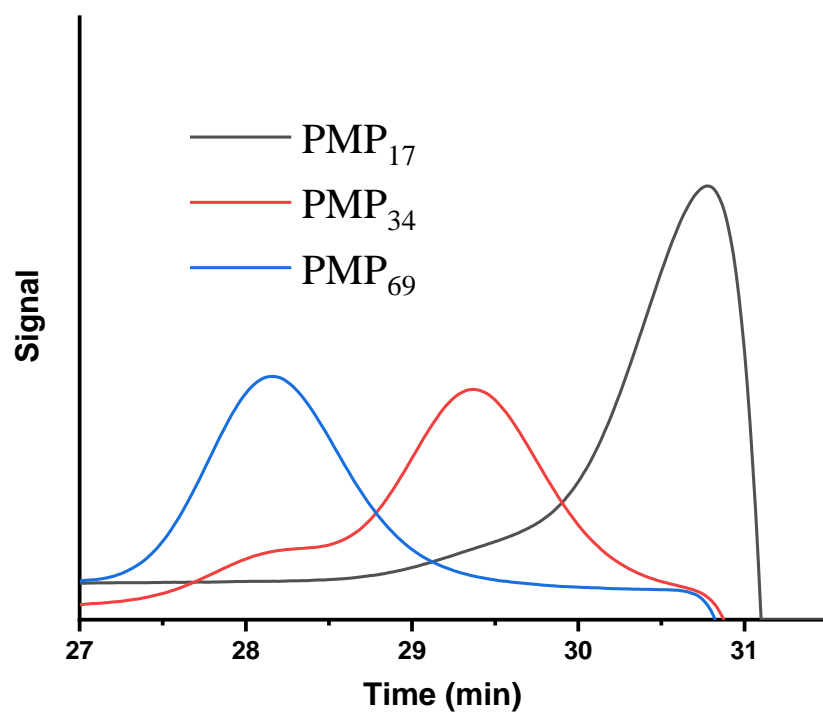

**Figure S3:** GPC of PMP<sub>17</sub>, PMP<sub>34</sub>, and PMP<sub>69</sub>.

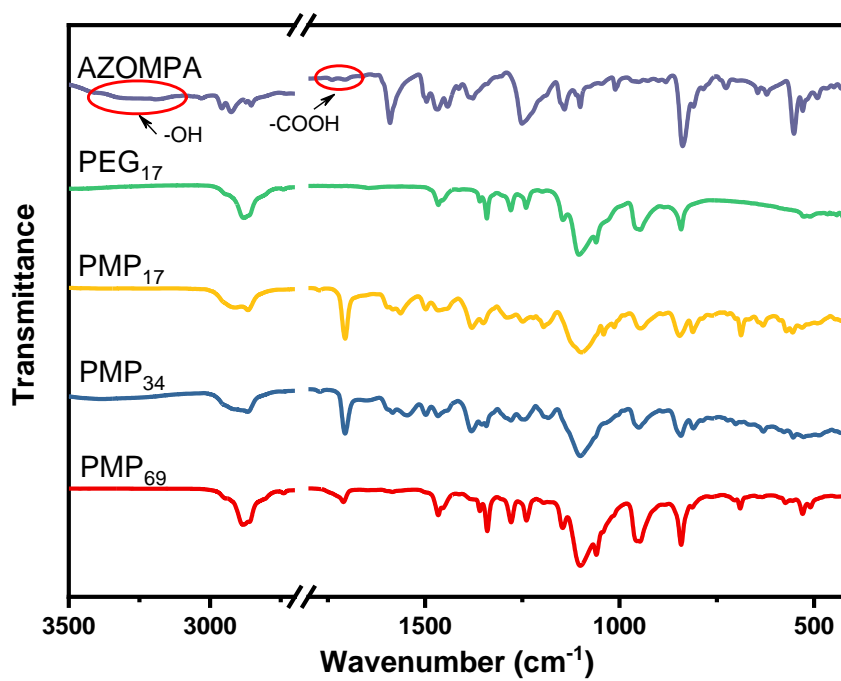

**Figure S4:** FTIR spectra of AZOMPA, PEG<sub>17</sub>, PMP<sub>17</sub>, PMP<sub>34</sub>, and PMP<sub>69</sub>.

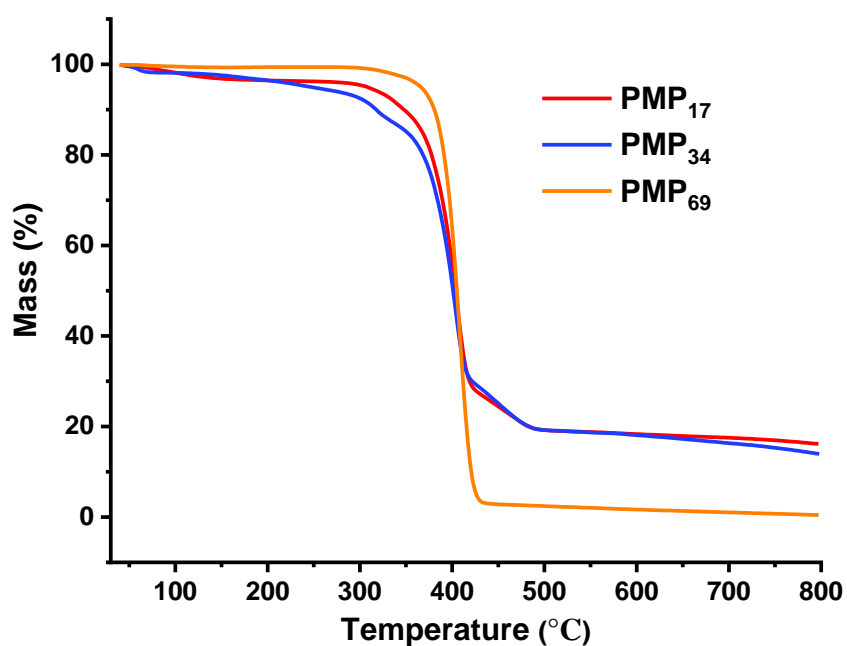

**Figure S5:** Weight loss curve determined by TGA of PMP<sub>17</sub>, PMP<sub>34</sub>, and PMP<sub>69</sub>.

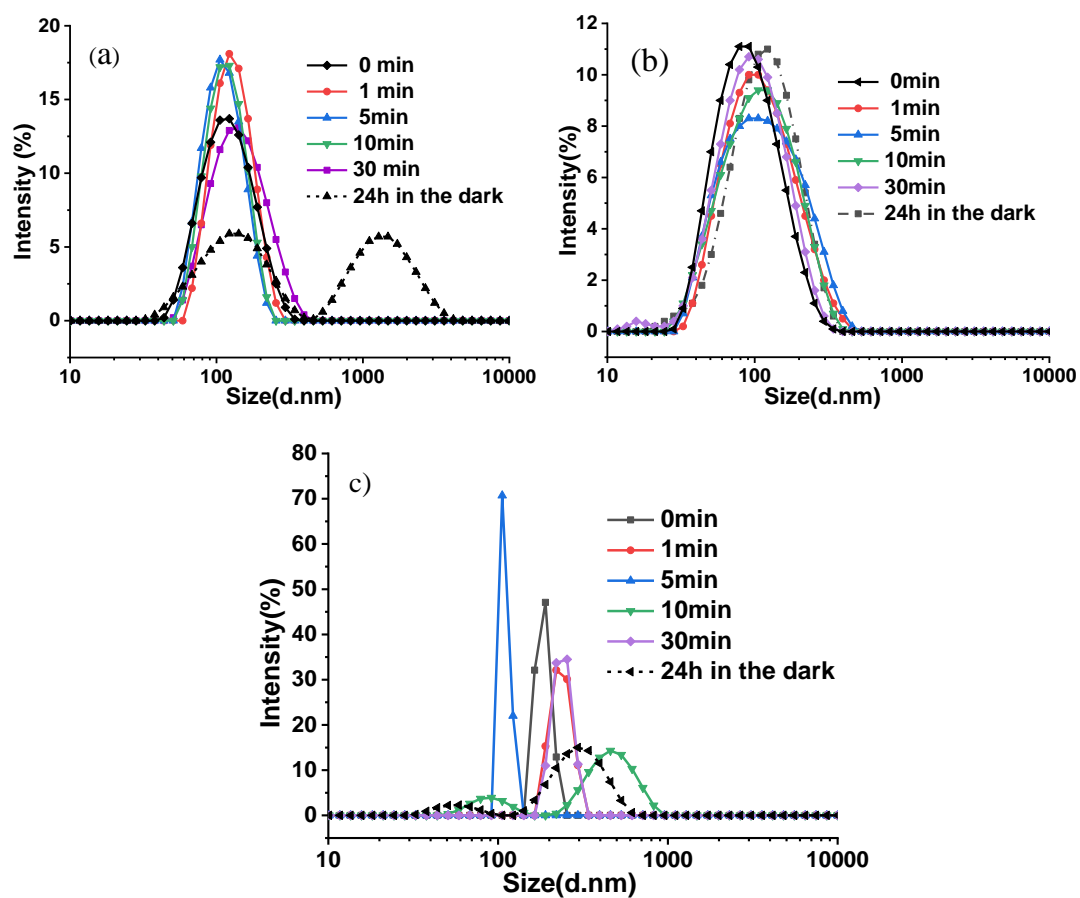

**Figure S6:** DLS of (a) PMP<sub>17</sub>, (b) PMP<sub>34</sub>, (c) PMP<sub>69</sub> water dispersions under UV irradiation.

**Table S1.** Mean Hydrodynamic Diameters (D<sub>h</sub>) and Polymer dispersity index (PDI) of the micelles

| sample            | D <sub>h</sub> (nm)/PDI |           |           |                |           |                  |
|-------------------|-------------------------|-----------|-----------|----------------|-----------|------------------|
|                   | 0s                      | 1min      | 5min      | 10min          | 30min     | 24h in the dark  |
| PMP <sub>17</sub> | 98/0.196                | 123/0.214 | 112/0.273 | 119/0.409      | 125/0.257 | (140,1490)/0.565 |
| PMP <sub>34</sub> | 75/0.389                | 105/0.328 | 106/0.364 | 113/0.404      | 114/0.385 | 87/0.295         |
| PMP <sub>69</sub> | 185/0.847               | 236/0.324 | 110/0.507 | (90,479)/0.801 | 239/1.000 | (58,312)/0.926   |
